# Supplementary material
Source: Springer Nature journal article supplement (https://www.springermedizin.de/resource/supplementary/13063_2014_2101_MOESM1_ESM.pdf/9621356)
Supplement: MOESM1 [file 9621356]

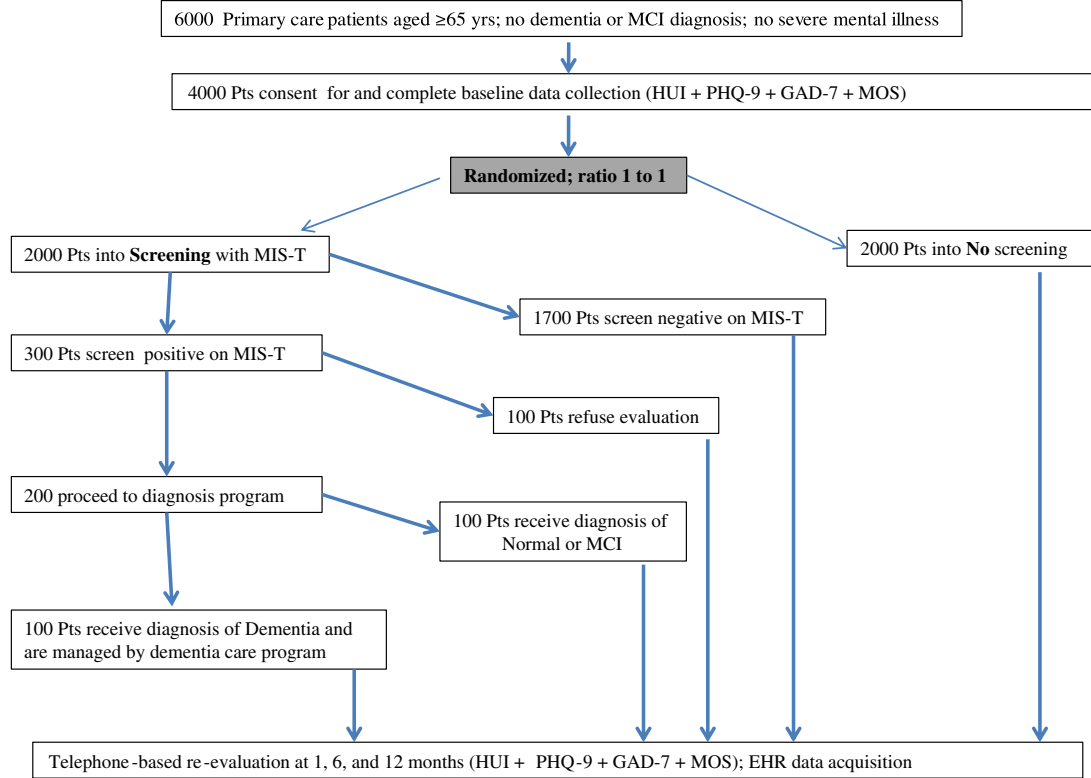

HUI: Health Utility Index; PHQ-9: Patient Health Questionnaire-9; GAD-7: General Anxiety Disorder screener; MOS: Medical Outcome Study; MIS-T: Memory Impairment Screen-telephone version; MCI: Mild Cognitive Impairment; HER-electronic health record.
